# Supplementary material
Source: PubMed Central journal article supplement (PMC2651147)
Supplement: NIHMS89263-supplement-sup_table.pdf [file NIHMS89263-supplement-sup_table.pdf]

*Supplemental Table I. PECAM-1 does not affect the concentration of plasma lipids.*

|     | <i>Apoe</i> <sup>-/-</sup> | <i>Pecam1</i> <sup>-/-</sup> <i>Apoe</i> <sup>-/-</sup> |
|-----|----------------------------|---------------------------------------------------------|
| TC  | 1212 ± 138                 | 1120 ± 97                                               |
| LDL | 1191 ± 137                 | 1091 ± 101                                              |
| TG  | 72 ± 8                     | 92 ± 26                                                 |

Values represent mg/dL.
