# Supplementary material
Source: PubMed Central journal article supplement (PMC2651147)

## Supplemental Figure II

■ *Pecam1*<sup>+/+</sup> *Apoe*<sup>-/-</sup> → *Pecam1*<sup>-/-</sup> *Apoe*<sup>-/-</sup>  
□ *Pecam1*<sup>-/-</sup> *Apoe*<sup>-/-</sup> → *Pecam1*<sup>-/-</sup> *Apoe*<sup>-/-</sup>

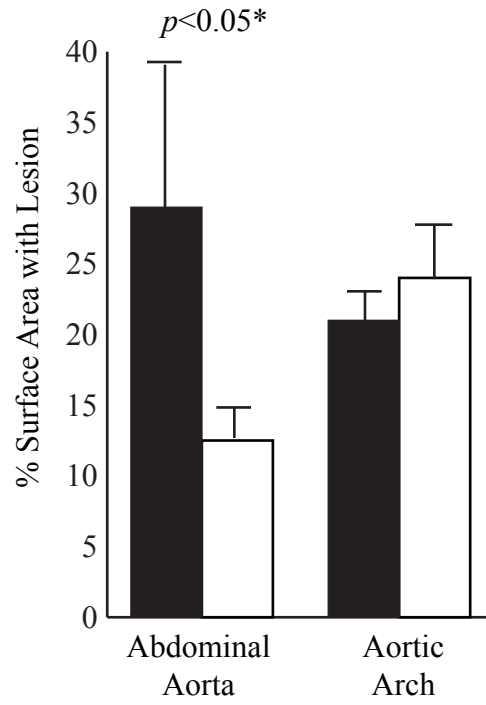

Supplement: NIHMS89263-supplement-supfig2.pdf [file NIHMS89263-supplement-supfig2.pdf]
