# Supplementary material
Source: PubMed Central journal article supplement (PMC2651147)

Supplemental Figure I

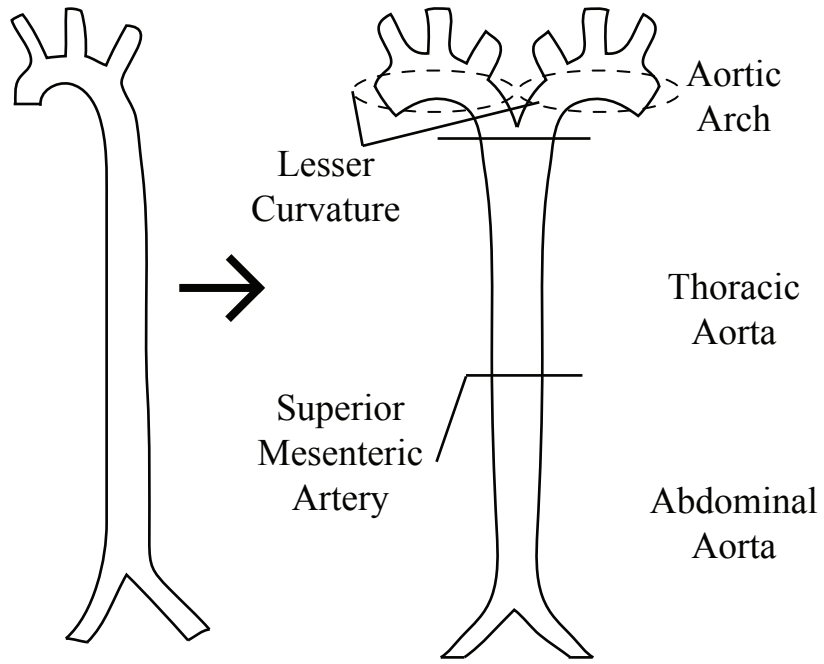

Supplement: NIHMS89263-supplement-supfig1.pdf [file NIHMS89263-supplement-supfig1.pdf]

### Supplemental Figure III

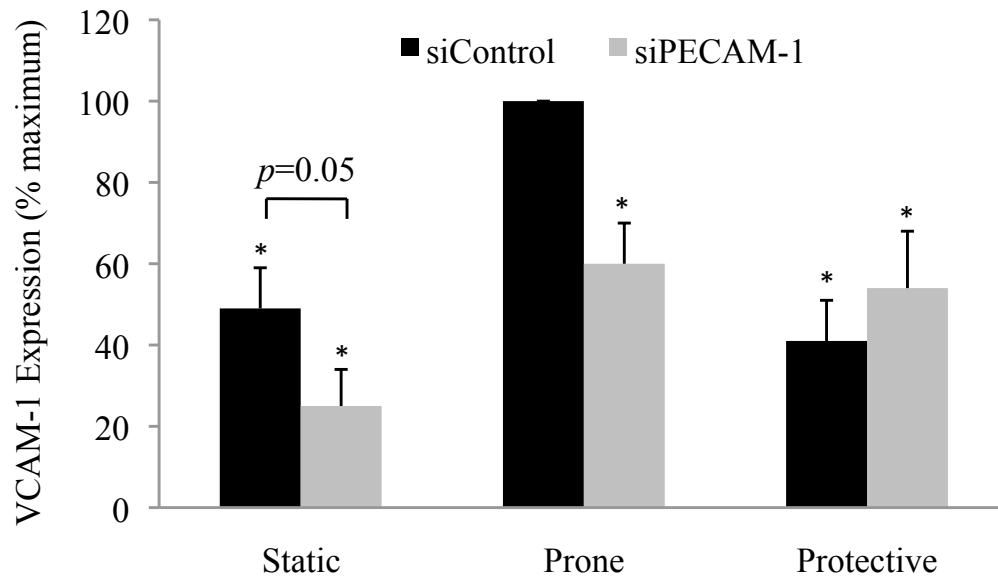

Supplement: NIHMS89263-supplement-supfig3.pdf [file NIHMS89263-supplement-supfig3.pdf]

Supplemental Figure IV

*ApoE*<sup>-/-</sup>

*Pecam1*<sup>-/-</sup>  
*ApoE*<sup>-/-</sup>

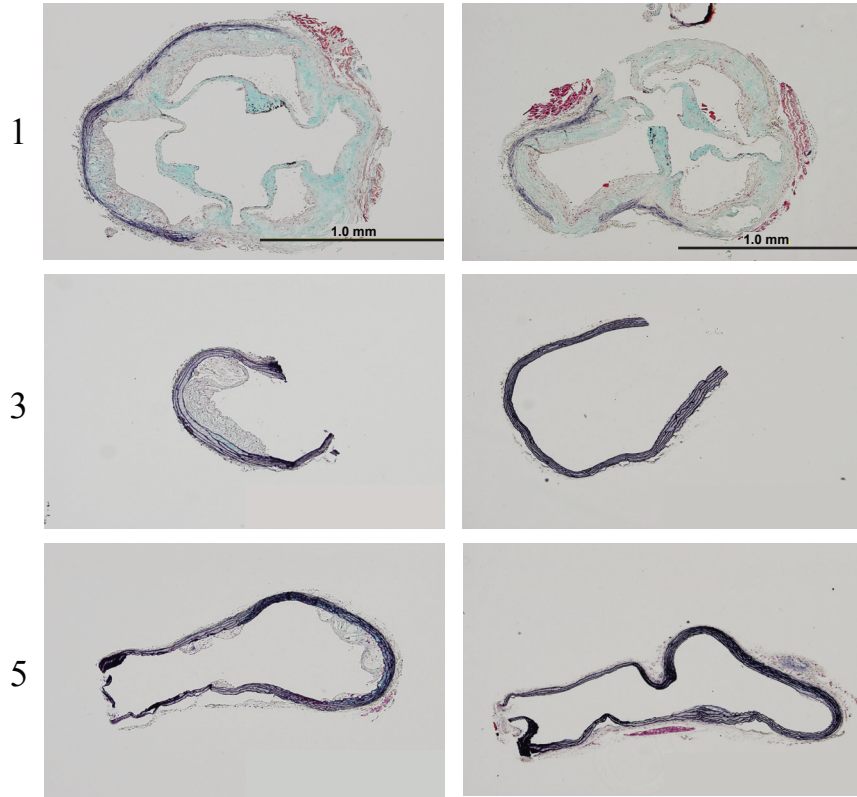

Supplement: NIHMS89263-supplement-supfig4.pdf [file NIHMS89263-supplement-supfig4.pdf]

# Supplemental Figure V

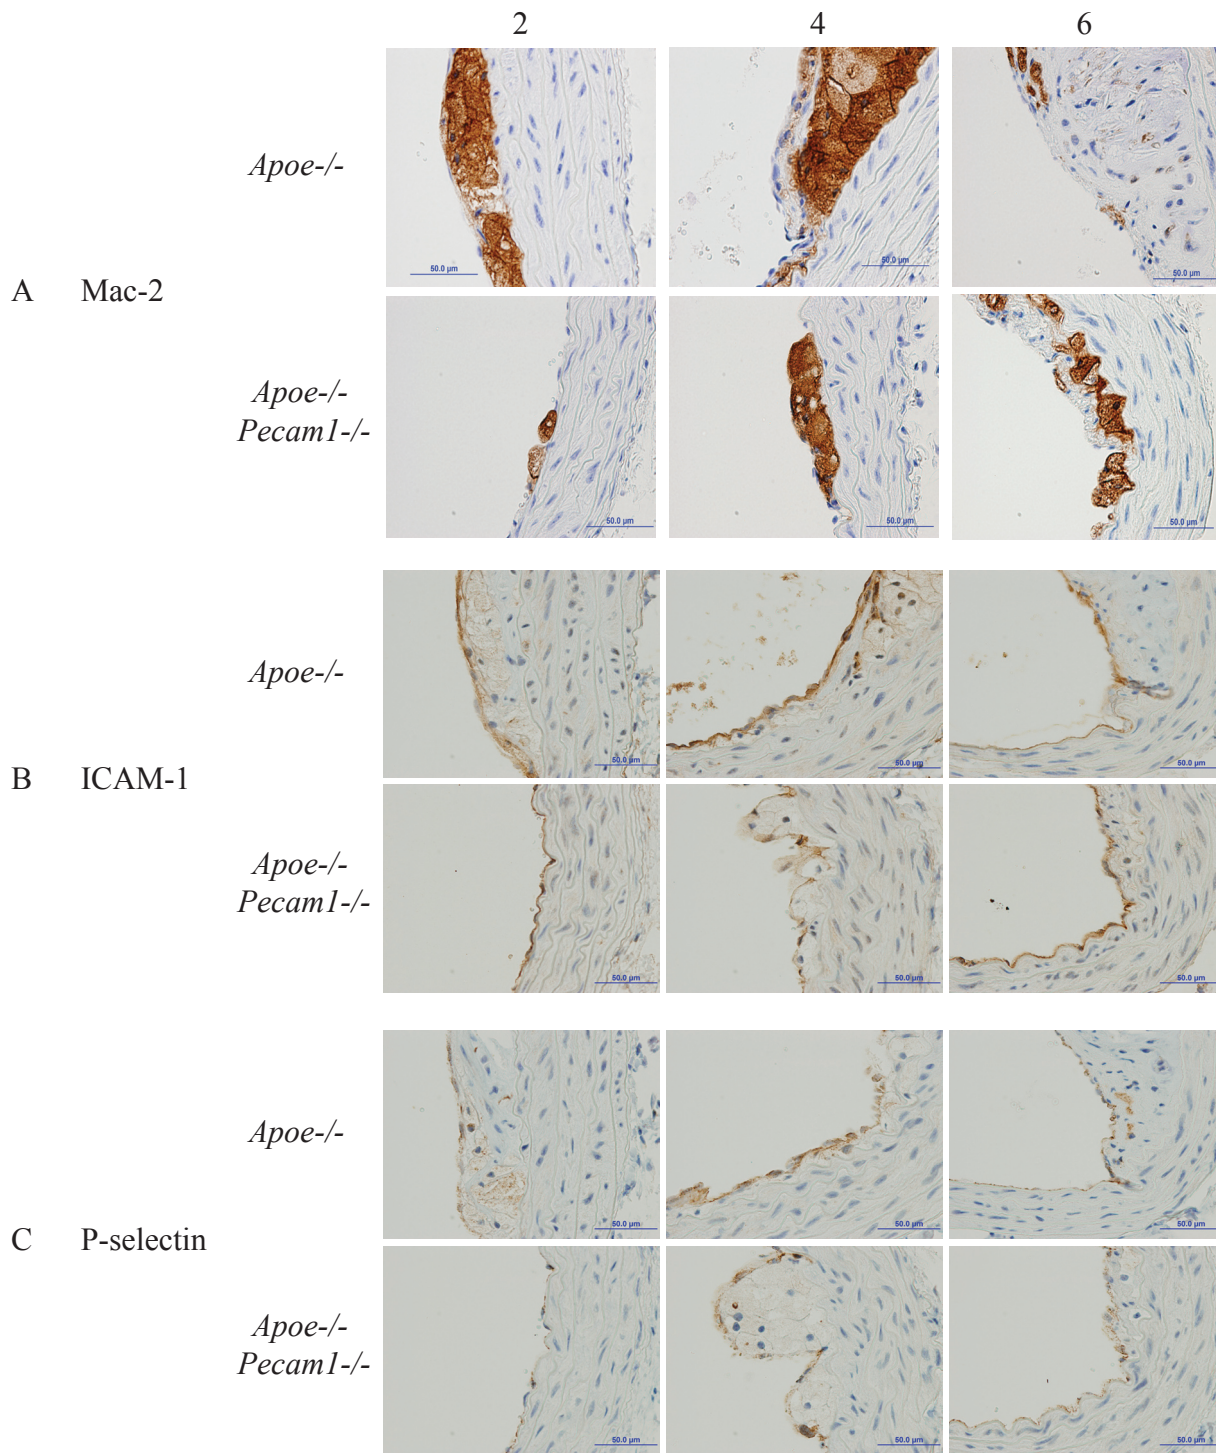

Supplement: NIHMS89263-supplement-supfig5.pdf [file NIHMS89263-supplement-supfig5.pdf]
